# Supplementary material for: Benefits and barriers to participation in colorectal cancer screening: a protocol for a systematic review and synthesis of qualitative studies
Source: HighWire-hosted journal article supplement (doi:10.1136/bmjopen-2013-004508), 2014-02-01
Supplement: bmjopen-2013-004508supp_appendix1.pdf [file bmjopen-2013-004508supp_appendix1.pdf]

**Appendix 1**  
Draft eligibility criteria

Level 1 screening (title and abstract review):

1. Is this study about colorectal cancer (CRC), CRC screening or both? YES/NO/UNCLEAR (YES = either or both)
2. Is this a qualitative study? YES/NO/UNCLEAR (we will be over-inclusive: any qualitative methodology is in)

If you answer NO to any of these questions, the study will be excluded. All other citations will be included.

Level 2 screening (full-text review):

1. Is this study about colorectal cancer (CRC), CRC screening or both? YES/NO/UNCLEAR (YES = either or both)
2. Is this a qualitative study? YES/NO/UNCLEAR (we will be over-inclusive: any qualitative methodology is in)
3. Does the study report on any of the relevant outcomes?

If you answer NO to any of these questions, the study will be excluded. All other citations will be included.
