# Supplementary material for: Benefits and barriers to participation in colorectal cancer screening: a protocol for a systematic review and synthesis of qualitative studies
Source: HighWire-hosted journal article supplement (doi:10.1136/bmjopen-2013-004508), 2014-02-01
Supplement: bmjopen-2013-004508supp_appendix2.pdf [file bmjopen-2013-004508supp_appendix2.pdf]

## Appendix 2

### Draft MEDLINE search strategy

Database: Ovid MEDLINE(R), Ovid MEDLINE(R) In-Process & Other Non-Indexed Citations, Ovid MEDLINE(R) Daily and Ovid OLDMEDLINE(R) <1946 to July 26, 2013>

Search Strategy:

---

- 1 exp Colorectal Neoplasms/
- 2 exp Colonic Neoplasms/
- 3 exp Rectal Neoplasms/
- 4 (anal adj cancer\$).mp.
- 5 (anal adj carcinoma\$).mp.
- 6 (anal adj adeno?carcinoma\$).mp.
- 7 (anal adj neoplasm\$).mp.
- 8 (anal adj tumo?r\$).mp.
- 9 (anal adj lesion\$).mp.
- 10 (anal adj adenom\$).mp.
- 11 (anal adj sarcom\$).mp.
- 12 (anal adj malignan\$).mp.
- 13 (anus adj cancer\$).mp.
- 14 (anus adj carcinoma\$).mp.
- 15 (anus adj adeno?carcinoma\$).mp.
- 16 (anus adj neoplasm\$).mp.
- 17 (anus adj tumo?r\$).mp.
- 18 (anus adj lesion\$).mp.
- 19 (anus adj adenom\$).mp.

- 20 (anus adj sarcom\$).mp.
- 21 (anus adj malignan\$).mp.
- 22 (bowel adj cancer\$).mp.
- 23 (bowel adj carcinoma\$).mp.
- 24 (bowel adj adeno?carcinoma\$).mp.
- 25 (bowel adj neoplasm\$).mp.
- 26 (bowel adj tumo?r\$).mp.
- 27 (bowel adj lesion\$).mp.
- 28 (bowel adj adenom\$).mp.
- 29 (bowel adj sarcom\$).mp.
- 30 (bowel adj malignan\$).mp.
- 31 (colorectal adj cancer\$).mp.
- 32 (colorectal adj carcinoma\$).mp.
- 33 (colorectal adj adeno?carcinoma\$).mp.
- 34 (colorectal adj neoplasm\$).mp.
- 35 (colorectal adj tumo?r\$).mp.
- 36 (colorectal adj lesion\$).mp.
- 37 (colorectal adj adenom\$).mp.
- 38 (colorectal adj sarcom\$).mp.
- 39 (colorectal adj malignan\$).mp.
- 40 (colon\$ adj cancer\$).mp.
- 41 (colon\$ adj carcinoma\$).mp.
- 42 (colon\$ adj adeno?carcinoma\$).mp.

- 43 (colon adj neoplasm\$).mp.
- 44 (colon\$ adj tumo?r\$).mp.
- 45 (colon\$ adj lesion\$).mp.
- 46 (colon\$ adj adenom\$).mp.
- 47 (colon\$ adj sarcom\$).mp.
- 48 (colon\$ adj malignan\$).mp.
- 49 (rectal adj carcinoma\$).mp.
- 50 (rectal adj cancer\$).mp.
- 51 (rectal adj adeno?carcinoma\$).mp.
- 52 (rectal adj neoplasm\$).mp.
- 53 (rectal adj tumo?r\$).mp.
- 54 (rectal adj lesion\$).mp.
- 55 (rectal adj adenom\$).mp.
- 56 (rectal adj sarcom\$).mp.
- 57 (rectal adj malignan\$).mp.
- 58 (rectum adj carcinoma\$).mp.
- 59 (rectum adj cancer\$).mp.
- 60 (rectum adj adeno?carcinoma\$).mp.
- 61 (rectum adj neoplasm\$).mp.
- 62 (rectum adj tumo?r\$).mp.
- 63 (rectum adj lesion\$).mp.
- 64 (rectum adj adenom\$).mp.
- 65 (rectum adj sarcom\$).mp.

- 66 (rectum adj malignan\$).mp.
- 67 (sigmoid adj cancer\$).mp.
- 68 (sigmoid adj adeno?carcinoma\$).mp.
- 69 (sigmoid adj neoplasm\$).mp.
- 70 (sigmoid adj tumo?r\$).mp.
- 71 (sigmoid adj lesion\$).mp.
- 72 (sigmoid adj adenom\$).mp.
- 73 (sigmoid adj sarcom\$).mp.
- 74 (sigmoid adj malignan\$).mp.
- 75 or/1-74
- 76 Early Detection of Cancer/
  - 77 exp Occult Blood/
  - 78 exp Immunochemistry/
  - 79 exp Endoscopy, Gastrointestinal/
  - 80 exp Colonoscopy/
  - 81 exp Sigmoidoscopy/
  - 82 Colonography, Computed Tomographic/
- 83 (disease adj2 detect\$).tw.
- 84 endoscop\$.mp.
- 85 colonograph\$.mp.
- 86 colonoscop\$.mp.
- 87 sigmoidoscop\$.mp.
- 88 rectosigmoidoscop\$.mp.

89 proctosigmoidoscop\$.mp.  
90 COL.mp.  
91 SIG.mp.  
92 FSIG.mp.  
93 (flex\$ adj3 sig\$).mp.  
94 faecal.mp.  
95 fecal.mp.  
96 feces.mp.  
97 faeces.mp.  
98 gFOBT.mp.  
99 FOBT.mp.  
100 FOB.mp.  
101 haemoccult.mp.  
102 hemoccult.mp.  
103 sensa.mp.  
104 hemocare.mp.  
105 (hema adj screen).mp.  
106 hemofec.mp.  
107 fecatest.mp.  
108 fecatwin.mp.  
109 coloscreen.mp.  
110 seracult.mp.  
111 colocare.mp.

- 112 flexsure.mp.
- 113 immocare.mp.
- 114 hemochaser.mp.
- 115 hemeselect.mp.
- 116 immudia.mp.
- 117 monohaem.mp.
- 118 insure.mp.
- 119 hemodia.mp.
- 120 immocare.mp.
- 121 magstream.mp.
- 122 guaiac.mp.
- 123 (occult adj blood).mp.
- 124 (stool adj3 occult).mp.
- 125 (immunochemical\$ adj3 test\$).mp.
- 126 (immunochemical\$ adj3 screen\$).mp.
- 127 (immunochemical\$ adj3 diagn\$).mp.
- 128 (immunologic\$ adj3 test\$).mp.
- 129 (immunologic\$ adj3 screen\$).mp.
- 130 (immunologic\$ adj3 diagn\$).mp.
- 131 EIA.mp.
- 132 RPHA.mp.
- 133 exp Mass Screening/
- 134 exp Population Surveillance/

135 surveillance.mp.  
136 (early adj3 detect\$.mp.  
137 (early adj3 prevent\$.mp.  
138 screen\$.mp.  
139 or/76-138  
140 interview\$.mp. [ qualitative search filter - validated ]  
141 experience\$.mp.  
142 qualitative.tw.  
143 or/140-142  
144 75 and 139 and 143  
145 exp Animals/ not (exp Animals/ and Humans/)  
146 144 not 145
